# Supplementary material for: Phylogenetics of varied subtypes of avian influenza viruses in China: potential threat to humans
Source: PubMed Central journal article supplement (PMC3978160; doi:10.1007/s13238-014-0036-1), 2014-03-14
Supplement: 13238_2014_36_MOESM1_ESM.pdf [file 13238_2014_36_MOESM1_ESM.pdf]

## Supplementary

### Materials and Methods

The PB1 gene sequences of each subtype were downloaded from The database at NCBI (Bao et al., 2008). We also limited the isolation region to “China”. For H5, H6, H7 and H9, we selected the sequences since the year 2008, 2007, 2005 and 2005, respectively. Then we performed Blastn using the four datasets against GenBank. In the Blast outputs, only sequences with subtypes different from that of the inputs (query datasets) were kept. Then the original four datasets and their own Blast output were combined, respectively. This gave four datasets, with each including 400, 496, 415 and 342 sequences. Multiple sequence alignment was performed using Muscle, respectively. Phylogenetic analysis was performed using RAxML (Stamatakis, 2014), with the GTRGAMMA model. One thousand bootstrap replicates were implemented. Full phylogenetic trees obtained in the first run were available on request. After the first run, we analyzed the phylogenetic trees and representative sequences were selected to compose smaller datasets for further phylogenetic analyses.

### Reference

Bao, Y., Bolotov, P., Dernovoy, D., Kiryutin, B., Zaslavsky, L., Tatusova, T., Ostell, J., and Lipman, D. (2008). The influenza virus resource at the National Center for Biotechnology Information. *Journal of virology* 82, 596-601.

Stamatakis, A. (2014). RAxML version 8: a tool for phylogenetic analysis and post-analysis of large phylogenies. *Bioinformatics*.

**Supplementary table 1, Distribution of poultry influenza virus subtypes in China.**

| Province  | Host    | Subtype                                                          |
|-----------|---------|------------------------------------------------------------------|
| Anhui     | Chicken | H5, H5N1, H9N2                                                   |
|           | Duck    | H5, H5N1, H7N9, H9N2                                             |
| Beijing   | Chicken | H9N2                                                             |
|           | Duck    | n/a                                                              |
| Chongqing | Chicken | H9N2                                                             |
|           | Duck    | H9N2                                                             |
| Fujian    | Chicken | H5, H5N1, H9N2                                                   |
|           | Duck    | H5N1, H6N2, H6N6, H7N3, H7N7, H9N2                               |
| Gansu     | Chicken | H9N2                                                             |
|           | Duck    | n/a                                                              |
| Guangdong | Chicken | H5, H5N1, H6N2, H7N9, H9N2                                       |
|           | Duck    | H10N8, H11N9, H3N2, H5N5, H6N2, H6N6, H6N8, H9N2                 |
| Guangxi   | Chicken | H1N2, H3N8, H5N1, H9N2                                           |
|           | Duck    | H1N1, H1N2, H3N2, H3N8, H4N2, H5N1, H6N1, H6N2, H6N5, H6N6, H6N8 |
| Guizhou   | Chicken | H5N1, H9N2                                                       |
|           | Duck    | H11N9, H5N1, H6N1, H6N2, H6N5, H6N6, H6N8                        |
| Hainan    | Chicken | H9N2                                                             |
|           | Duck    | n/a                                                              |
| Hebei     | Chicken | H5N1, H5N2, H9N2                                                 |
|           | Duck    | H5N2                                                             |
| Henan     | Chicken | H5N1, H9N2                                                       |

---

|                |         |                                                                                |
|----------------|---------|--------------------------------------------------------------------------------|
|                | Duck    | H5N1                                                                           |
| Hong Kong      | Chicken | H5N1, H9N2                                                                     |
|                | Duck    | n/a                                                                            |
| Hubei          | Chicken | H5, H5N1, H9N2                                                                 |
|                | Duck    | H5, H5N1, H5N5, H6N6, H9N2                                                     |
| Hunan          | Chicken | H5, H5N1, H9N2                                                                 |
|                | Duck    | H10N3, H11N9, H3N8, H4N2, H4N6, H4N9, H5N1, H5N2, H6N2, H6N6, H6N8, H6N9, H9N2 |
| Jiangsu        | Chicken | H10N9, H11N2, H5, H5N1, H5N2, H7N9, H9N2                                       |
|                | Duck    | H11N3, H1N3, H3N2, H3N6, H4N2, H4N8, H5N2, H5N8, H6N5, H6N6, H9N2              |
| Jiangxi        | Chicken | H5, H5N1, H7N7, H7N9, H9N2                                                     |
|                | Duck    | H11N2, H11N9, H4N6, H4N9, H6N2, H7N3, H7N6, H7N7, H7N8, H7N9                   |
| Jilin          | Chicken | H5, H5N1, H9N2                                                                 |
|                | Duck    | H5, H9N2                                                                       |
| Liaoning       | Chicken | H5N1, H9N2                                                                     |
|                | Duck    | H5, H5N1                                                                       |
| Inner Mongolia | Chicken | H5                                                                             |
|                | Duck    | n/a                                                                            |
| Ningxia        | Chicken | H5, H5N1, H9N2                                                                 |
|                | Duck    | n/a                                                                            |
| Shaanxi        | Chicken | H9N2                                                                           |
|                | Duck    | n/a                                                                            |
| Shandong       | Chicken | H5N1, H7N9, H9N2                                                               |
|                | Duck    | H4N6, H5N1                                                                     |
| Shanghai       | Chicken | H7N9, H9N2                                                                     |
|                | Duck    | H3N2, H4N2, H4N6, H9N2                                                         |

---

---

|          |         |                                                |
|----------|---------|------------------------------------------------|
| Shanxi   | Chicken | H5N1, H9N2                                     |
|          | Duck    | n/a                                            |
| Sichuan  | Chicken | H9N2                                           |
|          | Duck    | n/a                                            |
| Taiwan   | Chicken | H4, H5N2, H6N1                                 |
|          | Duck    | H1N3, H3N8, H4N2, H4N6, H4N8, H5N2             |
| Tianjin  | Chicken | H5, H9N2                                       |
|          | Duck    | H5                                             |
| Tibet    | Chicken | H5, H5N1, H5N2, H9N2                           |
|          | Duck    | H9N2                                           |
| Xinjiang | Chicken | H5, H5N1, H9N2                                 |
|          | Duck    | n/a                                            |
| Yunnan   | Chicken | H5, H5N1, H9N2                                 |
|          | Duck    | H11N9, H5N1, H6N2, H6N6, H7N6, H9N2            |
| Zhejiang | Chicken | H7N7, H7N9, H9N2, H9N9                         |
|          | Duck    | H1N2, H1N3, H3N3, H5N1, H7N2, H7N3, H7N7, H7N9 |

---

n/a: not available
